# Supplementary material for: Interventions for promoting physical activity among European teenagers: a systematic review
Source: Springer Nature journal article supplement (doi:10.1186/1479-5868-6-82), 2009-12-01
Supplement: Additional file 2 [file 1479-5868-6-82-s2.pdf]

**Table 2 | Intervention characteristics, main results and results of the quality assessment of the included studies**

| School setting                                                       |                 |                                                                                                                                                                                   |                                                                                                                     |                                                                                                                                                                                                                                                                     |                                                                                                                                 |                    |              |                         |          |                 |                          |               |
|----------------------------------------------------------------------|-----------------|-----------------------------------------------------------------------------------------------------------------------------------------------------------------------------------|---------------------------------------------------------------------------------------------------------------------|---------------------------------------------------------------------------------------------------------------------------------------------------------------------------------------------------------------------------------------------------------------------|---------------------------------------------------------------------------------------------------------------------------------|--------------------|--------------|-------------------------|----------|-----------------|--------------------------|---------------|
| Intervention details                                                 |                 |                                                                                                                                                                                   |                                                                                                                     |                                                                                                                                                                                                                                                                     |                                                                                                                                 | Quality assessment |              |                         |          |                 |                          |               |
| Study/ country                                                       | Study design    | Sample characteristics                                                                                                                                                            | Duration/ measurements                                                                                              | Outcomes                                                                                                                                                                                                                                                            | Main results                                                                                                                    | Selection bias     | Study design | Control for confounders | Blinding | Data collection | Withdrawals and dropouts | Global rating |
| Haerens et al. (2007) [23] Belgium                                   | CRCT            | n = 281<br>10 schools<br>mean age 13,2 (SD 0,7)<br>48% boys                                                                                                                       | 1 hour<br>- baseline<br>- 3 months after intervention                                                               | - total PA level (TPA) (min/day): school related PA index (school PA) (active transportation + extracurricular activities) + leisure time sport index (LTS) and leisure time active transport index (LTAT)                                                          | total PA: ↔<br>school PA: +<br>LTS: ↔<br>LTAT: ↔                                                                                | ***                | ***          | ***                     | **       | ***             | ***                      | ***           |
| Verstraete et al. (2006) [31] Belgium                                | CRCT            | n = 249<br>7 schools<br>I: mean age 10.8 (SD 0.6) (final sample)<br>C: mean age 10.9 (SD 0.7) (final sample)<br>49% boys                                                          | 3 months<br>- baseline<br>- 3 months after baseline                                                                 | - total activity counts: light (LPA), moderate (MPA) and vigorous intensity activity (VPA) during morning recess and lunch break (% of recess time and lunch break)<br>- MVPA engagement: moderate + vigorous intensity activity (% of recess time and lunch break) | morning recess: LPA: + (♀)<br>MPA:+++ (♀)<br>VPA: ↔<br>MVPA:++ (♀)<br>lunch break LPA: +++<br>MPA: +++<br>VPA: +++<br>MVPA: +++ | **                 | ***          | *                       | **       | ***             | ***                      | **            |
| Hill et al. (2007) [28] UK                                           | CRCT            | n = 620<br>22 classes<br>1 school<br>mean age (final sample) 16.97 (SD 1,4)<br>49% boys                                                                                           | 20 min.<br>- baseline<br>- 3 weeks after intervention                                                               | - average number of exercise sessions for at least 30 min/week during or after school without PE                                                                                                                                                                    | exercise sessions: ++ in L, LQ, LI                                                                                              | **                 | ***          | **                      | **       | *               | ***                      | **            |
| Tsorbatzoudis (2005) [30] Greece                                     | CT              | n = 366<br>4 schools<br>mean age 14,2 (SD 0,69)<br>48% boys                                                                                                                       | 12 weeks (36 PE lessons)<br>- baseline<br>A. end of the intervention<br>B. 4-6 weeks after intervention (subsample) | - exercise habits (score)                                                                                                                                                                                                                                           | A. exercise habits: +++<br>B. exercise habits: ↔                                                                                | **                 | ***          | **                      | **       | ***             | *                        | **            |
| Lubans and Sylva (2006) [38] UK<br>'Lifetime Activity Program'       | RCT             | n = 78 individuals who elected to participate in an unit on health and fitness rather than the traditional team sports offered at school<br>mean age 16,7 (SD 0,5);<br>38,5% boys | 10 weeks (2x/week)<br>- baseline<br>A. end of intervention<br>B. 3 months after intervention                        | - moderate to vigorous PA (min/week) of 20 min. or longer (MVPA)                                                                                                                                                                                                    | A. MVPA: +++<br>B. MVPA: ↔                                                                                                      | *                  | ***          | ***                     | *        | ***             | ***                      | *             |
| Murphy et al. (2006) [40] Ireland                                    | CRCT            | n = 90 sedentary girls<br>5 schools<br>mean age 16,3 (SD 0,6)                                                                                                                     | 6 months<br>- baseline<br>A. end of intervention<br>B. 1 month after intervention (subsample, process evaluation)   | - daily PA: duration (hours/week) and intensity of PA. (above 13 on the BORG RPE scale: moderate to vigorous PA)                                                                                                                                                    | A. in both I groups: (P-value NR)<br>duration: (+)<br>intensity: (+)                                                            | **                 | ***          | *                       | **       | *               | ***                      | *             |
| Lindberg et al. (2006) [37] Sweden<br>'An adventure with Pelle Pump' | Cross sectional | n = 1369<br>mean age<br>I:12,5 (SD 0,60)<br>C: 12,5 (SD 0,50)<br>50% boys                                                                                                         | 3 months<br>- after 2 year program                                                                                  | - PA index (score)                                                                                                                                                                                                                                                  | PA index: ↔                                                                                                                     | **                 | *            | *                       | ***      | **              | ***                      | *             |
| Chatzisarantis and Hagger (2005) [33] UK                             | RCT             | n = 83<br>2 schools<br>mean age 14,60 (SD 0,47)<br>49,5% boys                                                                                                                     | 5 min<br>- baseline<br>- after 5 weeks                                                                              | - PA during leisure time: frequency of mild, moderate and vigorous PA in the last 5 weeks                                                                                                                                                                           | PA participation: ↔                                                                                                             | **                 | ***          | **                      | *        | ***             | *                        | *             |
| Digelidis et al. (2003) [34] Greece                                  | CT              | n = 783<br>4 I, 19 C schools<br>I: mean age 11,88 (SD 0,60); 50% boys<br>C: mean age 12,14 (SD 0,77); 47% boys                                                                    | one school year (3x/week, 45 min)<br>- baseline<br>A. end of intervention<br>B. 10 months after intervention        | - behaviour: frequency of regular exercise in the previous month: regular exercise: intensive out of school exercise at least 2x/week for 1 hour or more                                                                                                            | A. PA behaviour: ↔<br>B. PA behaviour: ↔                                                                                        | *                  | ***          | **                      | *        | *               | *                        | *             |

| School setting with involvement of family                     |              |                                                                                             |                                                                                       |                                                                                                                                                                                                                                                                                                                                        |                                                                                                                                                                                                                                                                             |                    |              |                         |          |                 |                          |               |
|---------------------------------------------------------------|--------------|---------------------------------------------------------------------------------------------|---------------------------------------------------------------------------------------|----------------------------------------------------------------------------------------------------------------------------------------------------------------------------------------------------------------------------------------------------------------------------------------------------------------------------------------|-----------------------------------------------------------------------------------------------------------------------------------------------------------------------------------------------------------------------------------------------------------------------------|--------------------|--------------|-------------------------|----------|-----------------|--------------------------|---------------|
| Intervention details                                          |              |                                                                                             |                                                                                       |                                                                                                                                                                                                                                                                                                                                        |                                                                                                                                                                                                                                                                             | Quality assessment |              |                         |          |                 |                          |               |
| Study/ country                                                | Study design | Sample characteristics                                                                      | Duration/ measurements                                                                | Outcomes                                                                                                                                                                                                                                                                                                                               | Main results                                                                                                                                                                                                                                                                | Selection bias     | Study design | Control for confounders | Blinding | Data collection | Withdrawals and dropouts | Global rating |
| Harrison et al. (2006) [24] Ireland 'Switch off – get active' | CT           | n = 312<br>9 schools in areas of social disadvantage<br>mean age 10,2 (SD 0,70)<br>57% boys | 16 weeks (10 lessons/30 min)<br>- baseline<br>- end of intervention                   | - moderate to vigorous PA (MVPA):<br>principal PA + intensity (30 min blocks/day)                                                                                                                                                                                                                                                      | MVPA: +                                                                                                                                                                                                                                                                     | **                 | ***          | ***                     | **       | ***             | ***                      | ***           |
| Haerens et al. (2006, 2007) [27,43] Belgium                   | CRCT         | n = 2840<br>15 schools<br>mean age 13,1 (SD 0,8)<br>63% boys<br>32.5% of higher SES         | 2 school years<br>- baseline<br>A. end of first school year<br>B. end of intervention | - total PA level (TPA) (min/day):<br>school-related PA index (school PA)<br>+ leisure time PA index (LTPA)<br>(leisure time sport (LTS) + leisure time active transportation (LTAT))<br><br><i>Subsample</i><br>- accelerometer data: sedentary, PA of light intensity (LPA) and PA of moderate to vigorous intensity (MVPA) (min/day) | A. School PA: + (I and I+P)<br>LTAT: +++ (♀) (I)<br>TPA: ↔<br>LTS: ↔<br>Accelerometer data:<br>LPA: + (I and I+P)<br>MVPA: + (I+P)<br>meeting guidelines: ↔<br>B. School PA: + (♂)<br>LTPA: ↔<br>Accelerometer data sedentary: ↔<br>LPA: +++ (♂); + (♀)<br>MVPA: (+ ♂trend) | **                 | ***          | ***                     | **       | ***             | **                       | **            |
| Christodoulos et al. (2006) [26] Greece                       | CRCT         | n = 78<br>2 schools<br>I: mean age 11,2 (SD 0,40)<br>C: mean age 11,2 (SD 0,30)<br>54% boys | 1 school year (two 45 min PE classes /week)<br>- baseline<br>- end of intervention    | - duration, frequency and total time spent on total moderate to vigorous PA and organised moderate to vigorous PA: weekly leisure supervised activities out of school (hours/week TMVPA, OMVPA)<br>- % meeting the guidelines: 60 min/day of moderate to vigorous PA                                                                   | OMVPA: +<br>TMVPA: ↔ (trend)<br>meeting the guidelines: +                                                                                                                                                                                                                   | **                 | ***          | ***                     | **       | ***             | *                        | **            |

| School setting with involvement of family and community         |                           |                                                                                                        |                                                                   |                                                                                                                                                                                                                                                  |                                                                                                                |                    |              |                         |          |                 |                          |               |
|-----------------------------------------------------------------|---------------------------|--------------------------------------------------------------------------------------------------------|-------------------------------------------------------------------|--------------------------------------------------------------------------------------------------------------------------------------------------------------------------------------------------------------------------------------------------|----------------------------------------------------------------------------------------------------------------|--------------------|--------------|-------------------------|----------|-----------------|--------------------------|---------------|
| Intervention details                                            |                           |                                                                                                        |                                                                   |                                                                                                                                                                                                                                                  |                                                                                                                | Quality assessment |              |                         |          |                 |                          |               |
| Study/ country                                                  | Study design              | Sample characteristics                                                                                 | Duration/ measurements                                            | Outcomes                                                                                                                                                                                                                                         | Main results                                                                                                   | Selection bias     | Study design | Control for confounders | Blinding | Data collection | Withdrawals and dropouts | Global rating |
| Simon et al. (2004-2006) [29,44] France 'ICAPS'                 | CRCT                      | n = 954<br>8 schools<br>mean age 11,7(SD 0,6)<br>46,3% I; 51,8% C boys.                                | 4 school years<br>- baseline<br>- 6 months of intervention        | - leisure organised PA in and outside sport clubs (%)                                                                                                                                                                                            | LOPA: ++                                                                                                       | ***                | ***          | ***                     | *        | ***             | ***                      | **            |
| Jurg et al. (2006) [35] The Netherlands 'JUMP-in'               | CT                        | n = 510<br>6 schools (4 I, 2C)<br>49% I, 48% C boys<br>9-12 years<br>I: 71% ,C: 94% foreign ethnicity; | 1 school year<br>- baseline<br>- end of intervention              | - total PA score: min/day at least moderately active: daily activity score: PA score in moderate active min/day (MET-score ≥ 5) + sports score: total amount of min/day organized sports.<br>- meeting the guidelines: 60 min/day of moderate PA | total PA score: +<br>grade 4-5: ↔<br>grade 6: +++<br>meeting the guidelines: +<br>grade 4-5: ↔<br>grade 6: +++ | **                 | ***          | ***                     | *        | *               | *                        | *             |
| Moon et al. (1999) [39] UK 'Wessex Healthy School award Scheme' | two group pre-post design | n = 16 schools; pupil numbers ranged from 440 to 1486<br>mean age NR<br>11-16 years<br>% boys NR       | 4 school terms (15 months)<br>- baseline<br>- end of intervention | - PA behaviour : % taking part in sports at school (not PE) once or more a week                                                                                                                                                                  | PA behaviour: ↔                                                                                                | **                 | **           | *                       | *        | *               | **                       | *             |

| Community with involvement of schools                |                           |                                                                                                 |                                                                                                                                                      |                                                                                                                                                         |                                                                                                                                                      |                    |                 |                            |          |                    |                             |                  |
|------------------------------------------------------|---------------------------|-------------------------------------------------------------------------------------------------|------------------------------------------------------------------------------------------------------------------------------------------------------|---------------------------------------------------------------------------------------------------------------------------------------------------------|------------------------------------------------------------------------------------------------------------------------------------------------------|--------------------|-----------------|----------------------------|----------|--------------------|-----------------------------|------------------|
| Intervention details                                 |                           |                                                                                                 |                                                                                                                                                      |                                                                                                                                                         |                                                                                                                                                      | Quality assessment |                 |                            |          |                    |                             |                  |
| Study/<br>country                                    | Study<br>design           | Sample characteristics                                                                          | Duration/<br>measurements                                                                                                                            | Outcomes                                                                                                                                                | Main results                                                                                                                                         | Selection<br>bias  | Study<br>design | Control for<br>confounders | Blinding | Data<br>collection | Withdrawals<br>and dropouts | Global<br>rating |
| Baxter et al.<br>(1997) [25]<br>UK<br>'Action Heart' | CT                        | 1991: n = 2685<br>1994: n = 3224<br>4 schools<br>11 and 14 years (years 7 and 10)               | 3 years<br>- baseline<br>- end of intervention                                                                                                       | - exercise: % of the students that exercise 3 or more times weekly                                                                                      | exercise: ↔<br>(I increased with 4%, C remained stable, p-value NR )                                                                                 | **                 | ***             | **                         | **       | **                 | ***                         | **               |
| Primary care                                         |                           |                                                                                                 |                                                                                                                                                      |                                                                                                                                                         |                                                                                                                                                      |                    |                 |                            |          |                    |                             |                  |
| Intervention details                                 |                           |                                                                                                 |                                                                                                                                                      |                                                                                                                                                         |                                                                                                                                                      | Quality assessment |                 |                            |          |                    |                             |                  |
| Study/<br>country                                    | Study<br>design           | Sample characteristics                                                                          | Duration/<br>measurements                                                                                                                            | Outcomes                                                                                                                                                | Main results                                                                                                                                         | Selection<br>bias  | Study<br>design | Control for<br>confounders | Blinding | Data<br>collection | Withdrawals<br>and dropouts | Global<br>rating |
| Ortega-Sanchez et al.<br>(2004) [41]<br>Spain        | RCT                       | n = 448<br>mean age 17,0 (SD 2,4)<br>58 % boys                                                  | 3 x 5-10 min (baseline, 6 and 12 month visit)<br>- baseline<br>A. 6 month after 1 <sup>st</sup> session<br>B. 12 month after 1 <sup>st</sup> session | - proportion of actives: % of the sample<br>- duration (min/week), frequency (days/week) and intensity in points (mild = 1, moderate = 2, vigorous = 3) | A. proportion of A: ++<br>duration: +<br>frequency: ++<br>intensity: ++<br>B. proportion of A: ++<br>duration: ++<br>frequency: ++<br>intensity: +++ | **                 | ***             | **                         | *        | *                  | **                          | *                |
| Walker et al.<br>(2002) [42]<br>UK                   | RCT                       | n = 1488<br>eight general practitioners<br>mean age 14,8<br>49% boys                            | 20 min<br>- baseline<br>- 3 months after intervention<br>- 12 months after intervention                                                              | - prevalence of health related behaviour (PA): % of teenagers who reported positive behaviour change                                                    | A. PA behaviour: ↔<br>B. PA behaviour: ↔                                                                                                             | **                 | ***             | *                          | *        | *                  | *                           | *                |
| Kelleher et al.<br>(1999) [36]<br>Ireland            | one group pre-post design | n = 203 (8-11 years);<br>n = 111 (12-15 years),<br>n = 196 (adults)<br>mean age NR<br>47 % boys | 10 min.<br>- baseline<br>- 1 year after intervention                                                                                                 | - lifestyle characteristics: exercise: times/week,                                                                                                      | exercise behaviour: ↔                                                                                                                                | **                 | *               | *                          | *        | *                  | **                          | *                |
| Individual                                           |                           |                                                                                                 |                                                                                                                                                      |                                                                                                                                                         |                                                                                                                                                      |                    |                 |                            |          |                    |                             |                  |
| Intervention details                                 |                           |                                                                                                 |                                                                                                                                                      |                                                                                                                                                         |                                                                                                                                                      | Quality assessment |                 |                            |          |                    |                             |                  |
| Study/<br>country                                    | Study<br>design           | Sample characteristics                                                                          | Duration/<br>measurements                                                                                                                            | Outcomes                                                                                                                                                | Main results                                                                                                                                         | Selection<br>bias  | Study<br>design | Control for<br>confounders | Blinding | Data<br>collection | Withdrawals<br>and dropouts | Global<br>rating |
| Woods et al.<br>(2002) [32]<br>Scotland              | RCT                       | n = 459<br>mean age 19 (SD 4,5)<br>38% boys                                                     | PAL1 distributed in Jan.,<br>PAL 2 in Nov.<br>- baseline<br>- 7 months after baseline                                                                | - exercise behaviour: membership of the Sport and Recreation Service at the university (%)                                                              | exercise behaviour: +++                                                                                                                              | **                 | ***             | ***                        | **       | ***                | *                           | **               |

+++ = p≤0.001

++ = p≤0.01

+ = p≤0.05

↔ no significant effect (I vs C), sustained effect

\*\*\* = strong

\*\* = moderate

\* = weak

I: intervention group

C: control group

PA: physical activity

PE: physical education

NR: not reported

NA: not applicable
